# Supplementary material for: Flexible Film-Type Sensor for Electrochemical Measurement of Dopamine Using a Molecular Imprinting Method
Source: Frontiers journal article supplement (doi:10.3389/fsens.2021.725427), 2021-10-01
Supplement: Data_Sheet_1.PDF [file Data_Sheet_1.PDF]

Supporting information

## **Flexible Film-Type Sensor for Electrochemical Measurement of Dopamine by a Molecular Imprinting Method**

**Takumi Kishi<sup>1</sup>, Toshinori Fujie<sup>2,3\*</sup>, Hiroyuki Ohta<sup>4</sup>, Shinji Takeoka<sup>1,5\*</sup>,**

<sup>1</sup>Department of Life Science and Medical Bioscience, Graduate School of Advanced Science and Engineering, Waseda University, 2-2 Wakamatsu-cho, Shinjuku, Tokyo, 162-8480 (Japan)

<sup>2</sup>School of Life Science and Technology, Tokyo Institute of Technology, B-50, 4259 Nagatsuta-cho, Midori-ku, Yokohama 226-8501 (Japan)

<sup>3</sup>Research Organization for Nano & Life Innovation, Waseda University, 513 Wasedatsurumaki-cho, Shinjuku-ku, Tokyo 162-0041 (Japan)

<sup>4</sup>Department of Pharmacology, National Defense Medical College, 3-2 Namiki, Tokorozawa-shi, Saitama 359-8513 (Japan)

<sup>5</sup>Institute for Advanced Research of Biosystem Dynamics, Research Institute for Science and Engineering, Waseda University, 3-4-1 Ohkubo, Shinjuku-ku, Tokyo 169-8555, Japan

### **\* Correspondence:**

Dr. Toshinori Fujie

[t\\_fujie@bio.titech.ac.jp](mailto:t_fujie@bio.titech.ac.jp)

Dr. Shinji Takeoka

[takeoka@waseda.jp](mailto:takeoka@waseda.jp)

### 1) Preparation of a DA-PPy electrode on the Surface of a Glassy Carbon Electrode

A glassy carbon electrode (EC Frontier, GC-6355) sufficiently polished with a 0.5% alumina solution was connected to a potentiostat (Toyo Technica, SP -300) as a working electrode, a platinum wire was used as a counter electrode (CE), and a silver/silver chloride electrode was used as a reference electrode (RE). The electrode was immersed in a solution for electropolymerization of PPy (10 mM Pyrrole, 1 mM Dopamine Hydrochloride, 0.1 M SDS in Milli Q, N<sub>2</sub> bubbling for 20 min) in an electrochemical cell installed on a stirrer. The entire system was installed in a shield box covered with aluminum foil to shield external noise.

Electropolymerization of PPy by cyclic voltammetry (Scan speed: 10 mV/s, Scan range: 0 ~ 0.8

V, cycle number: 3 cycles, 100 rpm) provided a mixed layer of polypyrrole (PPy) and dopamine (DA) on the surface of the glassy carbon electrode. The prepared DA-containing PPy film on the glassy carbon electrode was washed with Milli Q and then the CV was swept (Scan speed: 40 mV/s, Scan range: -0.2 – 0.6 V, Cycle number: 60 cycles, 100 rpm) in 0.1 mol/L phosphate buffer solution, which was thoroughly degassed with nitrogen gas (20 min N<sub>2</sub> bubbling) to remove DA from the mixed layer of PPy and DA. Then the surface was washed with Milli Q, and CV (Scan speed: 50 mV/s, Scan range: -0.2 to 1.3 V, cycle number: 30 cycles) was swept again as a working electrode at a wider potential toward the oxidation side than during the elimination of DA in phosphate buffer solution in order to over-oxidize PPy. Thus, a PPy electrode using dopamine (DA) as a molecular template was prepared on a glassy carbon electrode (hereinafter referred to as a DA-PPy carbon electrode). In addition, a system in which DA was not added during PPy electropolymerization was used as a negative control (Hereinafter referred to as PPy electrode).

## 2) Measurement of Dopamine Using a DA-PPy Carbon Electrode

For the DA-PPy and PPy carbon electrodes, the calibration curves obtained from the current values at 0.24 V are shown in **Figure S1(A)** and **S1(B)**, respectively. The slope averaged for 3 times measurement was  $22 \pm 3.5$  nA/nM for the DA-PPy carbon electrode and  $13 \pm 3.1$  nA/nM for the PPy carbon electrode. It is due to the increase in the amount of DA adsorbed on the DA-PPy carbon electrode, and the effect of molecular imprinting using DA was confirmed.

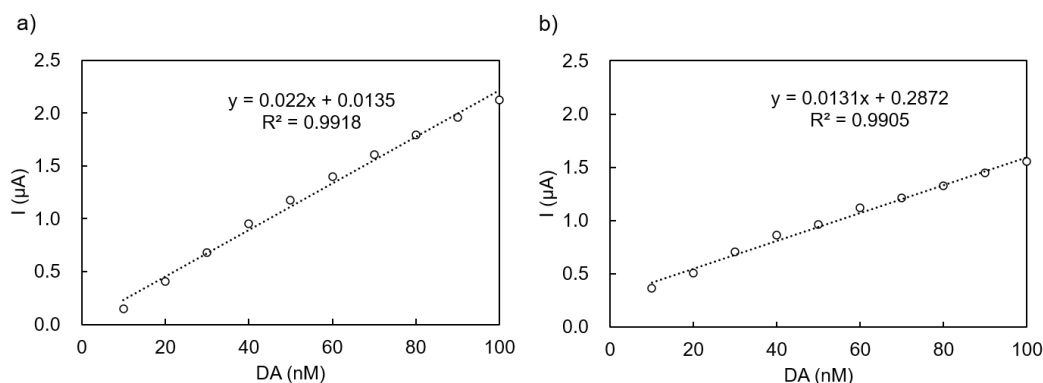

**Figure S1** Calibration curves of a) DA-PPy and b) PPy carbon electrodes at the oxidation potential of DA (0.24 V).

## 3) Selectivity of a DA-PPy Carbon Electrode for the Other Neurotransmitters

In order to evaluate the selectivity of the prepared DA-PPy carbon electrode on the glassy carbon electrode, it was used to measure norepinephrine (NE) and serotonin (5-HT) in a three-electrode system. Concretely, a DA-PPy carbon electrode or a PPy carbon electrode was used as a working electrode and immersed in 0.1 mol/L phosphate buffer, and a 10 µM NE or 5-HT phosphate

buffer was added to this solution to increase the concentrations of NE and 5-HT in 10 nM increments to 100 nM. The oxidation currents of NE or 5-HT were measured by sweeping the SWV with each 10 nM increase.

Different concentrations of neurotransmitters (DA, NE, and 5-HT) were subjected to SWV measurements to determine the oxidation potential of each transmitter. **Fig. S2** shows voltammograms of 100 nM DA, 1000 nM NE and 100 nM 5-HT using a DA-PPy carbon electrode.

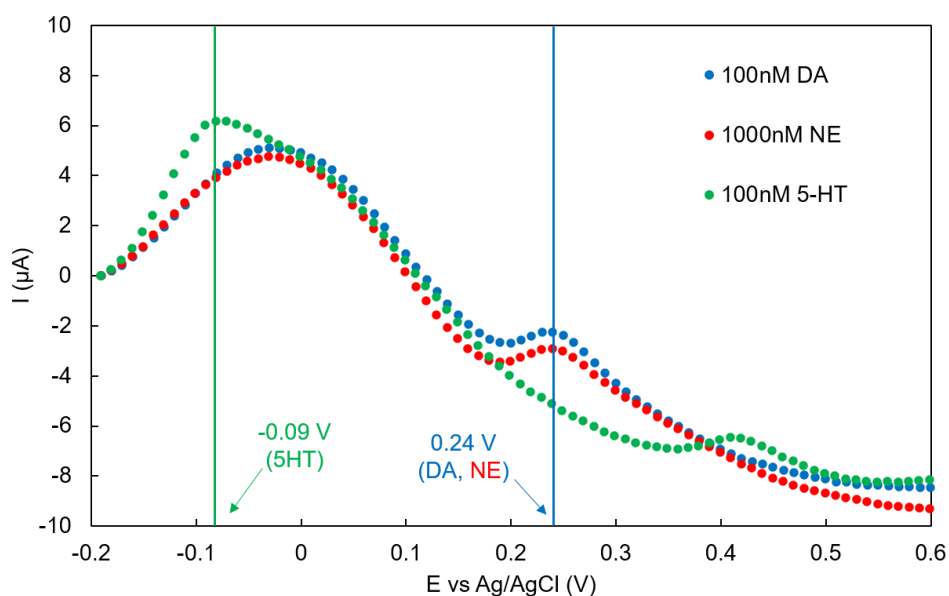

**Figure S2** SWV voltammogram of DA (100 nM), NE (1000 nM) and 5-HT (100 nM) (thicker condition)

Oxidation potentials were observed at 0.24 V for DA and NE and at -0.09 V for 5-HT. These results suggest that both NE and 5-HT would be observed as the same peak because the oxidation potential of NE is the same as that of 5-HT. Subsequently, the SWV voltammograms of DA, NE, and 5-HT in the low concentration region of 0-100 nM are shown in **Figure S3(A)**, **(B)**, and **(C)**, respectively. **Figure S3 (D)** shows the calibration curves at 0.24 V for DA and NE and at -0.09 V for 5-HT. The slopes of curve in Fig. S3d are summarized in **Table S1**. Since no oxidation peak was detected in the voltammograms of NE and 5-HT up to 100 nM, calibration curves were prepared based on the oxidation potential at 1  $\mu$ M at which the oxidation peak was detected.

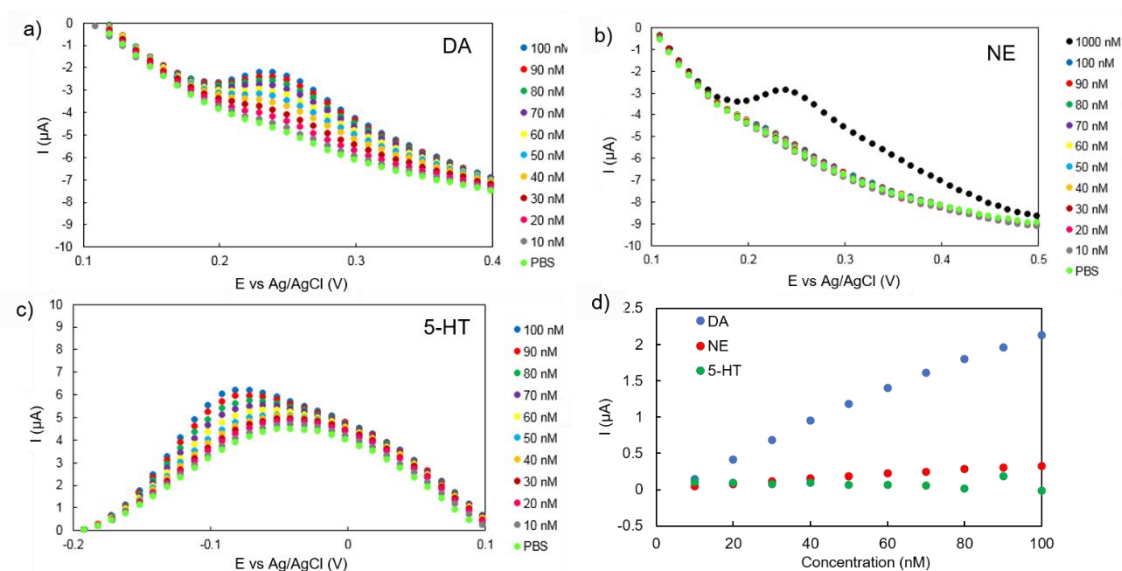

**Figure S3** SWV voltammograms of a) DA, b) NE, c) 5-HT. d) Calibration curves of DA, NE and 5-HT measured with DA-PPy carbon electrodes

**Table S1** Slope of the calibration curves of DA, NE and 5-HT

| Transmitter   | DA           | NE            | 5-HT           |
|---------------|--------------|---------------|----------------|
| Slope (nA/nM) | $22 \pm 3.5$ | $3.2 \pm 1.5$ | $-0.6 \pm 1.9$ |

In **Table S1**, the slope of the calibration curve of DA at 0.24 V was more than 6 times higher than that of NE and 5-HT. It is suggested that the sensitivity of DA at 0.24 V is sufficiently greater than that of NE or 5-HT, hence, DA can be selectively measured in the presence of NE or 5-HT.

#### 4) Evaluation of the Surface Area of a DA-PPy Electrode on a Gold Electrode on a Polyimide Film (hereinafter referred to as a DA-PPy film electrode)

The quantification measurement of DA in DA solutions was carried out using a three-electrode cell with the DA-PPy film electrode with different areas (1, 0.5, 0.4, 0.3, 0.2, and 0.1 mm<sup>2</sup>) as a working electrode. Each electrode was immersed in a well-degassed 0.1 mol/L phosphate buffer solution, and a 10 μM DA phosphate buffer solution was added to increase the concentration of DA by 10 nM to 100 nM, and square-wave voltammetry (SWV, scan range: -0.2 to 0.7 V, pulse height: 25 ms, pulse width: 25 ms, step height: 10 mV) was swept to measure the change in the oxidation current

of DA in the solution.

The SWV voltammograms of 0 - 50 nM solutions of DA were measured using DA-PPy film electrodes with electrode areas of 0.1 - 0.5 and 1.0 mm<sup>2</sup> as shown in **Figure S4**. The slope of the calibration curve for each electrode area is summarized in **Table S2**.

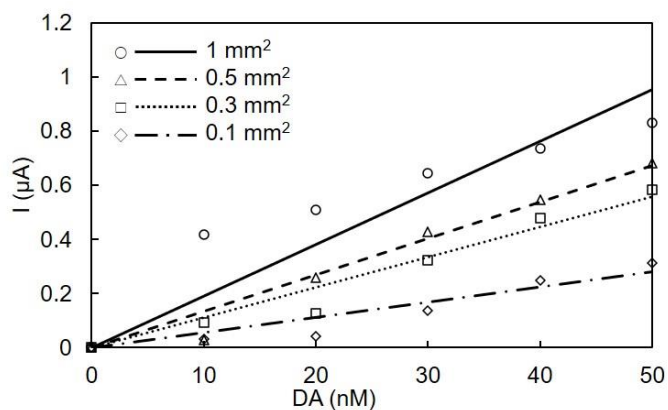

**Figure S4** Calibration curves of DA obtained by using the DA-PPy film electrodes with different areas among 0.1, 0.3, 0.5 and 1.0 mm<sup>2</sup>, respectively

**Table S2** Slopes of the calibration curves of DA obtained by using film DA-PPy electrodes with different areas (n = 3)

| Surface area (mm <sup>2</sup> ) | Slope (nA/nM) |
|---------------------------------|---------------|
| 1.0                             | 21±10         |
| 0.5                             | 19±4.4        |
| 0.4                             | 12±12         |
| 0.3                             | 13±15         |
| 0.2                             | 5.7±5.1       |
| 0.1                             | 7.2±4.7       |

From **Figure S4**, the current values increased in proportion to the DA concentration for electrode areas of 1.0 mm<sup>2</sup> and 0.5 mm<sup>2</sup>, however, in the electrode area of 0.4 mm<sup>2</sup> or less, the slope

decreased and the concentration dependence deteriorated as the concentration increased. **Table S2** also showed that the initial slope was higher than 10 nA/nM for electrode areas of 1.0 mm<sup>2</sup> and 0.5 mm<sup>2</sup>, while it was approximately 5 nA/nM for those of 0.4 mm<sup>2</sup> or less, with larger deviations among samples in comparison with those of larger electrodes. Based on the above results, we determined that 0.5 mm<sup>2</sup> is the smallest area where deviation is small and thus stable measurement is possible. In the following experiments in the text, DA-PPy film electrodes having the electrode area of 0.5 mm<sup>2</sup> were used.

#### 5) Interference of ascorbic acid and uric acid on the DA-PPy film electrode

We conducted the same experiments in the presence of ascorbic acid (AA) and uric acid (UA) with changing their concentrations from 0 to 50 nM. As shown in **Figure S5**, there is no increase in current till 50 nM for both molecules, that clearly shows the specificity of the electrode to DA.

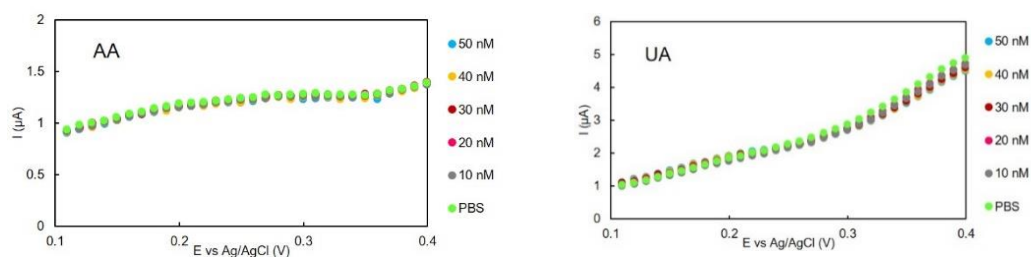

**Figure S5** SWV voltammograms of AA and UA with DA-PPy film electrodes
